# Supplementary material
Source: HighWire-hosted journal article supplement (https://ard.bmj.com/highwire/filestream/202402/field_highwire_adjunct_files/0/ARD_centre_list_139725.docx)
Supplement: ARD_centre_list_139725.docx [file ARD_centre_list_139725.docx]

### 16.1.4 List of investigators and other important participants in the study

ANNRHEUMDIS/2010/139725

| **Coordinating Investigator:**  Prof. Dr. med. Gerd-Rüdiger Burmester,  D-10117 Berlin  **Principal Investigators (only active study centers)**:  Dr. med. Christopher Amberger,  D-53474 Bad Neuenahr  Dr. med. Peer-Malte Aries,  D-22767 Hamburg  Prof. Dr. med. Martin Aringer, (  D-01307 Dresden  Prof. Dr. med. Christoph Baerwald,  D-04103 Leipzig  Dr. med. Michael Bäuerle  D-91054 Erlangen  Dr. med. Walter Behringer  D-36039 Fulda  Dr. med. Sylvia Berger  D-04683 Naunhof  OA Dr. med. Raoul Bergner,  D-67063 Ludwigshafen  Dr. med. Martin Bohl-Bühler  D-14469 Potsdam  Dr. med. Jan Brandt-Jürgens  D-12161 Berlin  Prof. Dr. med. Jürgen Braun  D-44652 Herne  Dr. med. Matthias Braun  D-27476 Cuxhaven  Prof. Dr. med. Harald Burkhardt  D-60590 Frankfurt  Dr. med. Edmund Edelmann  D-83043 Bad Aibling  Dr. med. Andreas Engel  D-70178 Stuttgart  Prof. Dr. med. Christoph Fiehn  D-76530 Baden-Baden  Prof. Dr. med. Markus Gaubitz  D-48149 Münster  Dr. med. Georg Gauler  D-49074 Osnabrück  Prof. Dr. med. Angela Gause  D-22609 Hamburg  Dr. med. Joachim Georgi  D-24351 Damp  Dr. med. Mathias Grünke  D-80336 München  Dr. med. Irmgard Gürtler  D-41460 Neuss  Prof. Dr. med. Michael Hammer  D-48324 Sendenhorst  PD Dr. med. Bernhard Heilig  D-69120 Heidelberg  Dr. med. Maria Höhle  D-22147 Hamburg  Dr. med. Andreas Kapelle  D-02977 Hoyerswerda  Dr. med. Kirsten Karberg  D-12161 Berlin  Dr. med. Thomas Karger  D-50670 Köln  Dr. sc. med. Peter Kästner  D-99096 Erfurt  Dr. med. Jörg Kaufmann  D-14974 Ludwigsfelde  Prof. Dr. med. Jörn Kekow  D-39245 Gommern  Prof. Dr. med. Herbert Kellner  D-80639 München  Prof. Dr. med. Gernot Keyßer  D-06120 Halle (Saale)  Prof. Dr. med. Ina Kötter  D-72076 Tübingen  Prof. Dr. med. Andreas Krause  D-13125 Berlin  Prof. Dr. med. Klaus Krüger  D-81541 München  Dr. med. Brigitte Krummel-Lorenz  D-60596 Frankfurt  Dr. med. Reiner Kurthen  D-52064 Aachen  PD Dr. med. Hans-Eckhard Langer  D-40217 Düsseldorf  Dr. med. Michael Leidert  D-21335 Lüneburg  Dr. med. Werner Liman  D-58135 Hagen  Dr. med. Thomas Linde  D-06108 Halle  Dr. med. Lothar Meier  D-65719 Hofheim  Prof. Dr. med. Gerhard A. Müller  D-37075 Göttingen  Prof. Dr. med. Hubert Nüßlein  D-90429 Nürnberg  Dr. med. Wolfgang Ochs  D-95445 Bayreuth  Dr. med. Blanche Piper  D-81925 München  Sven Remstedt  D-12435 Berlin  Dr. med. Constanze Richter  D-70372 Stuttgart  Dr. med. Matthias Richter  D-18059 Rostock  Dr. med. Karin Rockwitz  D-38642 Goslar  PD Dr. med. Ekkehard Röther  D-78054 Villingen-Schwenningen  PD Dr. med. Andrea Rubbert-Roth  D-50937 Köln  Prof. Dr. med. Reinhold-Ernst Schmidt  D-30625 Hannover  Prof. Dr. med. Andreas Schwarting  D-55131 Mainz  Dr. med. Holger Schwenke  D-01109 Dresden  Dr. med. Helmut Sörensen  D-14163 Berlin  Prof. Dr. med. Christof Specker  D-45239 Essen  Dr. med. Rainer Sprekeler  D-27404 Zeven  Dr. med. Frank Trautmann  D-55116 Mainz  Dr. med. Leonore Unger  D-01067 Dresden  Dr. med. Andreas Viardot  D-89081 Ulm  Dr. med. Ulrich von Hinüber  D-31134 Hildesheim  Dr. med. Jan Voswinkel  D-66424 Homburg-Saar  Dr. med. Siegfried Wassenberg  D-40882 Ratingen  Dr. med. Jörg Wendler  D-91056 Erlangen  Prof. Dr. med. Jürgen Wollenhaupt  D-22081 Hamburg  Dr. med. Wolf-Dieter Wörth  D-65189 Wiesbaden  Dr. med. Silke Zinke  D-13055 Berlin |
| --- |
